# Supplementary material for: Effectiveness of pyronaridine-artesunate against Plasmodium malariae, Plasmodium ovale spp, and mixed-Plasmodium infections: a post-hoc analysis of the CANTAM-Pyramax trial
Source: PubMed Central journal article supplement (PMC9329129; doi:10.1016/s2666-5247(22)00092-1), 2022-08
Supplement: mmc1.pdf [file mmc1.pdf]

# THE LANCET Microbe

## Supplementary appendix

This appendix formed part of the original submission and has been peer reviewed. We post it as supplied by the authors.

Supplement to: Groger M, Tona Lutete G, Mombo-Ngoma G, et al. Effectiveness of pyronaridine-artesunate against *Plasmodium malariae*, *Plasmodium ovale* spp, and mixed-*Plasmodium* infections: a post-hoc analysis of the CANTAM-Pyramax trial. *Lancet Microbe* 2022; published online May 30. [https://doi.org/10.1016/S2666-5247\(22\)00092-1](https://doi.org/10.1016/S2666-5247(22)00092-1).

**Supplementary Table 1** Signs and Symptoms of Malaria at Baseline by Centre and Overall (Post-hoc Analysis Set)

|                               | <b>All participants</b><br>N = 1502<br>n (%) | <b><i>P. falciparum</i></b><br><b>mono-infections</b><br>N = 1237<br>n (%) | <b><i>P. malariae</i></b><br><b>mono-infections</b><br>N = 6<br>n (%) | <b><i>P. ovale</i> spp.</b><br><b>mono-infections</b><br>N = 3<br>n (%) | <b><i>P. ovale curtisi</i></b><br><b>mono-infections</b><br>N = 2<br>n (%) | <b><i>P. ovale wallikeri</i></b><br><b>mono-infections</b><br>N = 1<br>n (%) | <b>Mixed infections</b><br>N = 183<br>n (%) | <b>No infection</b><br><b>(by qPCR)</b><br>N = 73<br>n (%) |
|-------------------------------|----------------------------------------------|----------------------------------------------------------------------------|-----------------------------------------------------------------------|-------------------------------------------------------------------------|----------------------------------------------------------------------------|------------------------------------------------------------------------------|---------------------------------------------|------------------------------------------------------------|
| Rigours/ Chills               | 779 (51.9)                                   | 657 (53.1)                                                                 | 2 (33.3)                                                              | 2 (66.7)                                                                | 1 (50.0)                                                                   | 1 (100.0)                                                                    | 92 (50.3)                                   | 26 (35.6)                                                  |
| Sweating                      | 420 (28.0)                                   | 352 (28.5)                                                                 | 0                                                                     | 0                                                                       | 0                                                                          | 0                                                                            | 46 (25.1)                                   | 22 (30.1)                                                  |
| Headache                      | 1017 (67.7)                                  | 849 (68.6)                                                                 | 2 (33.3)                                                              | 2 (66.7)                                                                | 2 (100.0)                                                                  | 0                                                                            | 124 (67.8)                                  | 40 (54.8)                                                  |
| Nausea                        | 307 (20.4)                                   | 267 (21.6)                                                                 | 0                                                                     | 2 (66.7)                                                                | 1 (50.0)                                                                   | 1 (100.0)                                                                    | 34 (18.6)                                   | 4 (5.5)                                                    |
| Vomiting                      | 401 (26.7)                                   | 356 (28.8)                                                                 | 0                                                                     | 1 (33.3)                                                                | 1 (50.0)                                                                   | 0                                                                            | 37 (20.2)                                   | 7 (9.6)                                                    |
| Cough                         | 566 (37.7)                                   | 468 (37.8)                                                                 | 2 (33.3)                                                              | 1 (33.3)                                                                | 0                                                                          |                                                                              | 67 (36.6)                                   | 28 (38.4)                                                  |
| Loss of appetite/<br>Anorexia | 694 (46.2)                                   | 611 (49.4)                                                                 | 1 (16.7)                                                              | 2 (66.7)                                                                | 2 (100.0)                                                                  | 0                                                                            | 61 (33.3)                                   | 19 (26.0)                                                  |
| Fatigue                       | 870 (57.9)                                   | 754 (61.0)                                                                 | 3 (50.0)                                                              | 2 (66.7)                                                                | 1 (50.0)                                                                   | 1 (100.0)                                                                    | 84 (45.9)                                   | 27 (37.0)                                                  |
| Myalgia                       | 435 (29.0)                                   | 381 (30.8)                                                                 | 1 (16.7)                                                              | 2 (66.7)                                                                | 1 (50.0)                                                                   | 1 (100.0)                                                                    | 39 (21.3)                                   | 12 (16.4)                                                  |
| Jaundice                      | 11 (0.7)                                     | 11 (0.9)                                                                   | 0                                                                     | 0                                                                       | 0                                                                          | 0                                                                            | 0                                           | 0                                                          |
| Hepatomegaly                  | 8 (0.5)                                      | 6 (0.5)                                                                    | 0                                                                     | 0                                                                       | 0                                                                          | 0                                                                            | 1 (0.5)                                     | 1 (1.4)                                                    |
| Splenomegaly                  | 138 (9.2)                                    | 104 (8.4)                                                                  | 0                                                                     | 1 (33.3)                                                                | 1 (50.0)                                                                   | 0                                                                            | 29 (15.8)                                   | 4 (5.5)                                                    |
| Other                         | 431 (28.7)                                   | 364 (29.4)                                                                 | 2 (33.3)                                                              | 2 (66.7)                                                                | 1 (50.0)                                                                   | 1 (100.0)                                                                    | 45 (24.6)                                   | 18 (24.7)                                                  |

Abbreviations: P. = Plasmodium; N = total number of malaria episodes; n = number of observations;
